# Supplementary material
Source: PubMed Central journal article supplement (PMC10676140)
Supplement: sj-pdf-1-jcb-10.1177_0271678X231189463.pdf [file sj-pdf-1-jcb-10.1177_0271678X231189463.pdf]

## Supplemental Materials

### Rapid, Selective and Homogeneous Brain Cooling with Transnasal Flow of Ambient Air for Pediatric Resuscitation

Raymond C Koehler<sup>1</sup>, Michael Reyes<sup>1</sup>, C Danielle Hopkins<sup>1</sup>, Jillian S Armstrong<sup>1</sup>, Suyi Cao<sup>1</sup>, Ewa Kulikowicz<sup>1</sup>, Jennifer K Lee<sup>1</sup>, Harikrishna Tandri<sup>2</sup>

Departments of <sup>1</sup>Anesthesiology and Critical Care Medicine, and <sup>2</sup>Medicine, Division of Cardiology, Johns Hopkins University School of Medicine

**Supplemental Table 1.** Arterial blood gases and pH during high nasal airflow at different rates.

|                         | Airflow  | Baseline    | 1 hour      | 2 hour      | 3 hour      | 4 hour      |
|-------------------------|----------|-------------|-------------|-------------|-------------|-------------|
| 1.8-kg piglets          |          |             |             |             |             |             |
| pH                      | 4 L/min  | 7.35 ± 0.07 | 7.34 ± 0.04 | 7.34 ± 0.06 | 7.33 ± 0.06 | 7.32 ± 0.05 |
|                         | 8 L/min  | 7.35 ± 0.06 | 7.37 ± 0.07 | 7.36 ± 0.04 | 7.38 ± 0.07 | 7.40 ± 0.08 |
|                         | 16 L/min | 7.37 ± 0.07 | 7.37 ± 0.07 | 7.39 ± 0.10 | 7.38 ± 0.03 | 7.38 ± 0.02 |
| PCO <sub>2</sub> (mmHg) | 4 L/min  | 42 ± 8      | 41 ± 5      | 39 ± 6      | 39 ± 6      | 42 ± 6      |
|                         | 8 L/min  | 44 ± 7      | 37 ± 4      | 38 ± 5      | 37 ± 8      | 35 ± 9      |
|                         | 16 L/min | 43 ± 5      | 41 ± 3      | 37 ± 6      | 42 ± 8      | 42 ± 8      |
| PO <sub>2</sub> (mmHg)  | 4 L/min  | 178 ± 31    | 169 ± 41    | 157 ± 24*   | 144 ± 14*   | 145 ± 15*   |
|                         | 8 L/min  | 149 ± 11    | 155 ± 39    | 135 ± 32    | 139 ± 25    | 137 ± 27    |
|                         | 16 L/min | 146 ± 12    | 146 ± 10    | 138 ± 16    | 119 ± 50    | 119 ± 53    |
| 4-kg piglet             |          |             |             |             |             |             |
| pH                      | 16 L/min | 7.38 ± 0.13 | 7.46 ± 0.06 | 7.45 ± 0.04 | 7.46 ± 0.03 | 7.45 ± 0.06 |
|                         | 32 L/min | 7.36 ± 0.08 | 7.34 ± 0.14 | 7.32 ± 0.15 | 7.31 ± 0.14 | 7.30 ± 0.16 |
|                         | 48 L/min | 7.43 ± 0.04 | 7.37 ± 0.07 | 7.38 ± 0.05 | 7.39 ± 0.06 | 7.40 ± 0.06 |
| PCO <sub>2</sub> (mmHg) | 16 L/min | 48 ± 19     | 36 ± 7      | 36 ± 8      | 33 ± 4*     | 35 ± 3*     |
|                         | 32 L/min | 41 ± 6      | 43 ± 18     | 48 ± 18     | 46 ± 18     | 47 ± 18     |
|                         | 48 L/min | 37 ± 1      | 41 ± 7      | 35 ± 3      | 37 ± 3      | 34 ± 2      |
| PO <sub>2</sub> (mmHg)  | 16 L/min | 135 ± 52    | 138 ± 46    | 145 ± 37    | 147 ± 33    | 146 ± 27    |
|                         | 32 L/min | 147 ± 42    | 157 ± 50    | 146 ± 33    | 152 ± 29    | 154 ± 59    |
|                         | 48 L/min | 133 ± 35    | 135 ± 36    | 147 ± 60    | 124 ± 66    | 177 ± 47    |
| 15-kg piglets           |          |             |             |             |             |             |
| pH                      | 16 L/min | 7.42 ± 0.09 | 7.39 ± 0.05 | 7.39 ± 0.05 | 7.36 ± 0.09 | 7.36 ± 0.12 |
|                         | 32 L/min | 7.45 ± 0.05 | 7.42 ± 0.03 | 7.47 ± 0.05 | 7.44 ± 0.05 | 7.46 ± 0.07 |
|                         | 48 L/min | 7.39 ± 0.06 | 7.41 ± 0.05 | 7.41 ± 0.04 | 7.41 ± 0.04 | 7.41 ± 0.05 |
| PCO <sub>2</sub> (mmHg) | 16 L/min | 35 ± 6      | 37 ± 4      | 38 ± 7      | 40 ± 7      | 39 ± 8      |
|                         | 32 L/min | 34 ± 5      | 42 ± 4      | 36 ± 7      | 37 ± 7      | 34 ± 6      |
|                         | 48 L/min | 39 ± 8      | 41 ± 5      | 39 ± 7      | 38 ± 4      | 39 ± 8      |
| PO <sub>2</sub> (mmHg)  | 16 L/min | 162 ± 19    | 151 ± 27    | 145 ± 35    | 143 ± 34    | 145 ± 34    |
|                         | 32 L/min | 165 ± 12    | 159 ± 14    | 162 ± 17    | 155 ± 12    | 155 ± 14    |
|                         | 48 L/min | 167 ± 14    | 157 ± 12    | 144 ± 23*   | 144 ± 25*   | 137 ± 31*   |

Values are means ±SD. \* *P* <0.05 from baseline by repeated measures ANOVA and Dunnett's test.

**Supplemental Table 2.** Arterial and sagittal sinus blood analysis in blood flow experiment.

|                                                             | Baseline    | Duration of nasal airflow |              |              |
|-------------------------------------------------------------|-------------|---------------------------|--------------|--------------|
|                                                             |             | 15 min                    | 30 min       | 60 min       |
| 4-kg piglets                                                |             |                           |              |              |
| Arterial pH                                                 | 7.33 ± 0.07 | 7.33 ± 0.12               | 7.32 ± 0.07  | 7.30 ± 0.10  |
| Venous pH                                                   | 7.26 ± 0.06 | 7.28 ± 0.11               | 7.23 ± 0.06  | 7.22 ± 0.07  |
| Arterial PCO <sub>2</sub> (mmHg)                            | 41.3 ± 2.7  | 43.1 ± 9.6                | 40.6 ± 9.0   | 41.4 ± 7.6   |
| Venous PCO <sub>2</sub> (mmHg)                              | 51.3 ± 7.4  | 49.1 ± 8.9                | 46.9 ± 7.6   | 50.2 ± 5.3   |
| Arterial PO <sub>2</sub> (mmHg)                             | 143 ± 15    | 127 ± 27                  | 133 ± 25     | 135 ± 26     |
| Venous PO <sub>2</sub> (mmHg)                               | 43.6 ± 11.6 | 48.0 ± 12.5               | 47.9 ± 12.8  | 48.2 ± 16.0  |
| Hemoglobin (g/dL)                                           | 8.7 ± 1.7   | 8.7 ± 1.2                 | 8.3 ± 1.4    | 8.2 ± 1.5    |
| Venous O <sub>2</sub> saturation (%)                        | 50.4 ± 16.9 | 60.4 ± 16.0               | 60.7 ± 16.2* | 62.8 ± 17.6* |
| CaO <sub>2</sub> – CvO <sub>2</sub> (mL O <sub>2</sub> /dL) | 5.9 ± 1.6   | 4.7 ± 1.7*                | 4.5 ± 1.7**  | 4.1 ± 1.7*** |
|                                                             |             |                           |              |              |
| 15-kg piglets                                               |             |                           |              |              |
| Arterial pH                                                 | 7.38 ± 0.06 | 7.38 ± 0.08               | 7.34 ± 0.06  | 7.34 ± 0.08  |
| Venous pH                                                   | 7.33 ± 0.07 | 7.34 ± 0.08               | 7.30 ± 0.06  | 7.29 ± 0.08  |
| Arterial PCO <sub>2</sub> (mmHg)                            | 37.5 ± 3.6  | 37.5 ± 5.5                | 37.7 ± 7.2   | 43.6 ± 9.1   |
| Venous PCO <sub>2</sub> (mmHg)                              | 45.4 ± 6.2  | 44.2 ± 7.7                | 46.2 ± 6.4   | 51.7 ± 13.8  |
| Arterial PO <sub>2</sub> (mmHg)                             | 153 ± 7     | 150 ± 17                  | 144 ± 16     | 142 ± 16     |
| Venous PO <sub>2</sub> (mmHg)                               | 51.1 ± 14.9 | 55.6 ± 18.0               | 64.9 ± 9.8   | 59.4 ± 7.3   |
| Hemoglobin (g/dL)                                           | 10.9 ± 1.4  | 10.8 ± 1.6                | 10.6 ± 1.8   | 11.4 ± 1.6   |
| Venous O <sub>2</sub> saturation (%)                        | 68.8 ± 14.4 | 78.8 ± 4.3                | 81.5 ± 9.0*  | 79.8 ± 7.6*  |
| CaO <sub>2</sub> – CvO <sub>2</sub> (mL O <sub>2</sub> /dL) | 5.1 ± 2.6   | 3.4 ± 1.0                 | 3.1 ± 1.6*   | 3.4 ± 1.4    |

Values are means ± SD; \*  $P < 0.05$ , \*\*  $P < 0.01$ ,  $P < 0.001$  from baseline by repeated measures ANOVA and the Dunnett's test.
